# Supplementary material for: A cross-sectional study evaluating insulin injection techniques and the impact of instructions from various healthcare professionals on insulin users in the southern region of Saudi Arabia
Source: PeerJ journal article supplement (doi:10.7717/peerj.19394), 2025-05-12
Supplement: STROBE.pdf [file STROBE.pdf]

STROBE Statement—Checklist of items that should be included in reports of *cross-sectional studies*

|                          | Item No | Recommendation                                                                                                                                                                       | Remark                                                                                                                                                                                                                         |
|--------------------------|---------|--------------------------------------------------------------------------------------------------------------------------------------------------------------------------------------|--------------------------------------------------------------------------------------------------------------------------------------------------------------------------------------------------------------------------------|
| Title and abstract       | 1       | (a) Indicate the study’s design with a commonly used term in the title or the abstract                                                                                               | The study design is indicated in the lines 1 and 37                                                                                                                                                                            |
|                          |         | (b) Provide in the abstract an informative and balanced summary of what was done and what was found                                                                                  | The balanced summary of "what was done and what was found" is mentioned in the lines 37-39 and 44-49                                                                                                                           |
| Introduction             |         |                                                                                                                                                                                      |                                                                                                                                                                                                                                |
| Background/rationale     | 2       | Explain the scientific background and rationale for the investigation being reported                                                                                                 | The scientific background is written in the lines 71-82; the rationale for the current study is in 83-89.                                                                                                                      |
| Objectives               | 3       | State specific objectives, including any prespecified hypotheses                                                                                                                     | This point is indicated in the lines 89-92.                                                                                                                                                                                    |
| Methods                  |         |                                                                                                                                                                                      |                                                                                                                                                                                                                                |
| Study design             | 4       | Present key elements of study design early in the paper                                                                                                                              | The key elements of the study design have been mentioned in the lines95-96, 102, 104-105, and 119-122.                                                                                                                         |
| Setting                  | 5       | Describe the setting, locations, and relevant dates, including periods of recruitment, exposure, follow-up, and data collection                                                      | The period of the study is indicated in lines96-97; location where the study was conducted is mentioned in 119-120. The administration of the questionnaire, follow-up and the data collection are mentioned in lines 124-126. |
| Participants             | 6       | (a) Give the eligibility criteria, and the sources and methods of selection of participants                                                                                          | The eligibility criteria to choose the participants are described in the lines 120-122, and the method of selection of the participants is described in line # 124.                                                            |
| Variables                | 7       | Clearly define all outcomes, exposures, predictors, potential confounders, and effect modifiers. Give diagnostic criteria, if applicable                                             | The study outcomes that are to be measured are given in the lines 108-117.                                                                                                                                                     |
| Data sources/measurement | 8*      | For each variable of interest, give sources of data and details of methods of assessment (measurement). Describe comparability of assessment methods if there is more than one group | The source of data is the participants' responses collected using the questionnaire (line# 124-126), and the method of assessment and the comparability of the groups                                                          |

|                        |     |                                                                                                                                                                                                   |                                                                                                                   |
|------------------------|-----|---------------------------------------------------------------------------------------------------------------------------------------------------------------------------------------------------|-------------------------------------------------------------------------------------------------------------------|
|                        |     |                                                                                                                                                                                                   | are mentioned in lines 126-132.                                                                                   |
| Bias                   | 9   | Describe any efforts to address potential sources of bias                                                                                                                                         | Not applicable                                                                                                    |
| Study size             | 10  | Explain how the study size was arrived at                                                                                                                                                         | The sample size calculation is described in the lines 97-100.                                                     |
| Quantitative variables | 11  | Explain how quantitative variables were handled in the analyses. If applicable, describe which groupings were chosen and why                                                                      | The method for handling the quantitative variables is described in the lines 128-131.                             |
| Statistical methods    | 12  | (a) Describe all statistical methods, including those used to control for confounding                                                                                                             | There are no confounding factors in this study and the statistical method used is described in the lines 128-132. |
|                        |     | (b) Describe any methods used to examine subgroups and interactions                                                                                                                               | Not applicable.                                                                                                   |
|                        |     | (c) Explain how missing data were addressed                                                                                                                                                       | The responses with missing data were eliminated from the data analysis.                                           |
|                        |     | (d) If applicable, describe analytical methods taking account of sampling strategy                                                                                                                | Not applicable.                                                                                                   |
|                        |     | (e) Describe any sensitivity analyses                                                                                                                                                             | Not applicable.                                                                                                   |
| <b>Results</b>         |     |                                                                                                                                                                                                   |                                                                                                                   |
| Participants           | 13* | (a) Report numbers of individuals at each stage of study—eg numbers potentially eligible, examined for eligibility, confirmed eligible, included in the study, completing follow-up, and analysed | The number of participants at each stage is described in the lines 137-138.                                       |
|                        |     | (b) Give reasons for non-participation at each stage                                                                                                                                              | Incomplete response (line 138)                                                                                    |
|                        |     | (c) Consider use of a flow diagram                                                                                                                                                                | Since there are no complex methods of recruitment, flow diagram may not be necessary.                             |
| Descriptive data       | 14* | (a) Give characteristics of study participants (eg demographic, clinical, social) and information on exposures and potential confounders                                                          | The characteristics of the study participants are given in the lines 139-147.                                     |
|                        |     | (b) Indicate number of participants with missing data for each variable of interest                                                                                                               | The responses with missing data were eliminated from the data analysis (line# 137-138)                            |
| Outcome data           | 15* | Report numbers of outcome events or summary measures                                                                                                                                              | All the outcome events and summary measures are explained in the lines 148-203                                    |

|                          |    |                                                                                                                                                                                                              |                                                                                      |
|--------------------------|----|--------------------------------------------------------------------------------------------------------------------------------------------------------------------------------------------------------------|--------------------------------------------------------------------------------------|
| Main results             | 16 | (a) Give unadjusted estimates and, if applicable, confounder-adjusted estimates and their precision (eg, 95% confidence interval). Make clear which confounders were adjusted for and why they were included | Not applicable                                                                       |
|                          |    | (b) Report category boundaries when continuous variables were categorized                                                                                                                                    | Not applicable                                                                       |
|                          |    | (c) If relevant, consider translating estimates of relative risk into absolute risk for a meaningful time period                                                                                             | Not applicable                                                                       |
| Other analyses           | 17 | Report other analyses done—eg analyses of subgroups and interactions, and sensitivity analyses                                                                                                               | Not applicable                                                                       |
| <b>Discussion</b>        |    |                                                                                                                                                                                                              |                                                                                      |
| Key results              | 18 | Summarise key results with reference to study objectives                                                                                                                                                     | The key results are compared with the existing relevant studies in the lines 211-300 |
| Limitations              | 19 | Discuss limitations of the study, taking into account sources of potential bias or imprecision. Discuss both direction and magnitude of any potential bias                                                   | The limitations of the study is discussed in the lines 302-304                       |
| Interpretation           | 20 | Give a cautious overall interpretation of results considering objectives, limitations, multiplicity of analyses, results from similar studies, and other relevant evidence                                   | The interpretations of the key results are explained in the lines 211-300            |
| Generalisability         | 21 | Discuss the generalisability (external validity) of the study results                                                                                                                                        | Discussed in the lines 302-304.                                                      |
| <b>Other information</b> |    |                                                                                                                                                                                                              |                                                                                      |
| Funding                  | 22 | Give the source of funding and the role of the funders for the present study and, if applicable, for the original study on which the present article is based                                                | The funding information is mentioned in the lines 315-317.                           |

\*Give information separately for exposed and unexposed groups.

**Note:** An Explanation and Elaboration article discusses each checklist item and gives methodological background and published examples of transparent reporting. The STROBE checklist is best used in conjunction with this article (freely available on the Web sites of PLoS Medicine at <http://www.plosmedicine.org/>, Annals of Internal Medicine at <http://www.annals.org/>, and Epidemiology at <http://www.epidem.com/>). Information on the STROBE Initiative is available at [www.strobe-statement.org](http://www.strobe-statement.org).
