# Supplementary material for: A cross-sectional study evaluating insulin injection techniques and the impact of instructions from various healthcare professionals on insulin users in the southern region of Saudi Arabia
Source: PeerJ. 2025 May 12;13:e19394. doi: 10.7717/peerj.19394 (PMC12080473; doi:10.7717/peerj.19394)
Supplement: Supplemental Information 1 — This dataset provides the coded data collected from the participants on each item of the questionnaire. [file peerj-13-19394-s001.xlsx]

## Sheet: Form Responses 1
Timestamp	العمرAge (سنه)	الجنسSex	Educational statusالمستوى التعليمي	Area of residence مكان الاقامه	Occupation المهنة	Insulin administrationطريقه الحقن	Type of diabetes نوع السكري	Duration of diabetes (مدة المرض بالسنوات (سنه	Do you think your insulin injection technique is correct? هل تعتقد أن طريقة حقن الأنسولين لديك صحيحة؟	Who instructed you about insulin injection technique?من الذي دربك على حقن الأنسولين	Where do you store your insulin pen after you begin to use the pen? أين تخزن قلم الأنسولين بعد البدء في استخدام القلم؟	Before the injection do you clean the skin with disinfectant (e.g. an alcohol swab)? قبل الحقن،هل تقوم بتنظيف الجلد "مكان الحقن" بمطهر (على سبيل المثال باستخدام مسحة طبية)؟	Before attaching the needle into the pen, do you clean the stopper with disinfectant (e.g. an alcohol swab)? قبل توصيل الإبرة في القلم ،هل تقوم بتنظيف السدادة بمطهر (على سبيل المثال باستخدام مسحة طبية)?	Do you check the expiry date of your pen? هل تحقق من تاريخ انتهاء قلمك؟	Do you bring insulin to room temperature before injecting it?هل تجلب الإبرة إلى درجة حرارة الغرفة قبل حقنها ؟	If you use cloudy insulin, do you re-mix your insulin before use? إذا كنت تستخدم الأنسولين الغائم، هل تعيد خلط/تحريك الإنسولين قبل الاستخدام؟	Do you use new needle for every injection? هل تستخدم إبرة جديدة لكل حقنه؟	Do you prime the device by observing drop of insulin at needle tip?هل أنت تراقب القلم من خلال مراقبة قطرات الأنسولين في طرف الإبرة؟	What is the gap between injection and meal?كم الوقت الذي تجعله بين الحقن والوجبة؟	What site do you use the most? ما هو الجزء اللي تحقن فيه أكثر؟	Do you rotate injection sites? هل تغير مكان الحقن	What is the angle of insulin pen while penetrating into the skin? ما هي زاوية القلم أثناء الحقن ؟	Do you make a skin fold? هل تطوي الجلد عند الحقن؟	Are your injection sites inspected in each visit?هل يتم فحص مواقع الحقن الخاصة بك في كل زيارة للمستشفى؟	Do you have any swelling or lumps under the skin at your usual injection sites that have been there for some time? هل لديك أي تورم أو كتل تحت الجلد في مواقع الحقن المعتادة لديك؟	How long do you leave the needle under the skin after you have pushed the plunger in? كم من الوقت تترك الإبرة تحت الجلد بعد الحقن؟	Does insulin ever leak out of your injection site on the skin? هل يتسرب الأنسولين من موقع الحقن على الجلد؟	Do you message the site of injection after injection? هل تدلك موقع الحقن بعد الحقن؟	Do you ever inject through your clothing? هل تحقن الانسولين من خلال ملابسك؟	How long do you use an insulin pen after first use? كم مدة إتستخدام قلم الأنسولين بعد أول استخدام؟	In the last six months have you experienced hypoglycemia (low blood sugar)? في الأشهر الستة الماضية ، هل عانيت من انخفاض في سكر الدم؟	If yes, how many times in the last six months have you had hypoglycemia so severe you needed assistance from another person? إذا كانت الإجابة بنعم ، كم مرة خلال الأشهر الستة الماضية كنت تعاني من نقص السكر في الدم لدرجة أنك كنت بحاجة إلى مساعدة من شخص آخر؟	Do you have your own glucometer? هل تملك جهاز قياس السكر خاص بك؟	How often do you do finger-pricks to check your blood glucose? كم عدد المرات التي تقيس فيها السكر ؟	Do you ever miss or skip an injection? هل تخطيت جرعه من قبل؟	Reason for missing a dose?(more than one answer are allowed) ما الأسباب التي جعلتك تتخطى الجرعه (يسمح بأكثر من إجابه)؟	Do you have any challenges / difficulties in using insulin?( more than one answer are allowed) هل لديك أي تحديات / صعوبات في استخدام الأنسولين؟ (يُسمح بأكثر من إجابة)
2020-02-23 17:45:40	38	2	3	1	2	1	1	1	1	4	1	1	0	0	1	1	0	2	1	2	1	3	1	0	0	1	1	1	1	1	1		1	4	2	2	4
2020-02-27 12:39:20	42	1	3	1	1	1	1	2	2	4	2	1	0	0	1	0	0	2	1	2	1	3	0	0	0	1	1	1	1	1	0	1	1	4	3	2, 3, 4	1
2020-02-27 17:39:58	36	2	4	1	2	1	3	1	1	4	1	1	0	1	0	0	0	2	1	3	1	2	0	0	0	4	1	0	1	1	0	1	1	1	3	1	6
2020-02-27 17:40:35	15	1	2	1	1	1	1	1	1	5	1	1	0	1	0	0	0	1	1	4	1	4	1	1	1	1	1	0	1	1	0	1	1	1	2	2	6
2020-02-27 17:46:40	28	2	3	1	2	1	3	1	2	4	1	1	0	1	1	0	1	2	1	2	0	3	1	0	1	4	0	1	1	1	1		1	1	3	5	8
2020-02-27 17:49:36	47	2	1	1	4	1	2	1	2	2	1	1	1	1	0	0	0	2	3	1	1	3	1	0	0	1	1	0	1	1	1		1	1	3	2	4
2020-02-27 17:50:25	29	1	3	1	1	1	1	1	1	4	1	1	1	1	0	1	1	1	1	4	1	3	1	0	0	1	1	1	1	1	0	1	1	1	3	2	5
2020-02-27 17:50:44	50	1	3	2	4	1	2	2	1	2	2	1	0	1	1	1	0	1	1	2	1	3	1	0	0	2	1	0	1	1	0	1	1	1	2	2	5
2020-02-27 17:51:08	38	1	3	1	1	1	1	2	2	4	1	0	1	1	0	1	0	1	3	2	1	3	1	0	0	1	0	0	1	1	1		1	5	2	5	5
2020-02-27 17:54:26	42	2	3	1	1	1	1	2	1	2	1	0	0	1	0	1	1	0	1	2	1	1	0	0	1	1	1	1	1	1	0	1	1	5	3	2	2
2020-02-27 17:55:24	55	2	3	1	4	2	1	2	1	3	1	1	1	1	1	1	1	1	1	2	1	3	0	1	0	2	1	1	1	1	1		1	1	2	2	6
2020-02-27 17:57:17	23	2	3	2	2	1	1	2	1	2	2	1	0	1	1	1	1	0	1	2	1	3	1	0	1	2	1	1	1	1	1		1	2	3	2	3
2020-02-27 17:57:59	37	1	3	1	1	1	1	3	1	1	1	0	0	0	0	1	0	2	1	2	0	3	1	0	1	1	1	1	1	1	0	1	1	5	2	3	5
2020-02-27 18:01:48	40	2	1	2	2	1	1	2	2	4	1	1	1	1	1	1	1	1	1	2	1	4	1	1	1	1	1	0	0	1	0	1	1	3	1		5
2020-02-27 18:01:57	35	1	3	1	1	1	2	2	1	2	2	1	0	1	0	1	1	1	3	2	1	2	1	1	0	4	1	0	0	1	1		1	1	1		3
2020-02-27 18:02:11	40	2	3	1	1	2	1	1	2	4	1	1	1	1	0	1	1	1	1	2	1	4	1	0	0	1	1	1	1	1	1		1	3	4	5	1
2020-02-27 18:02:48	35	1	3	1	1	1	2	2	1	2	2	1	0	1	0	1	1	1	3	2	1	2	1	1	0	4	1	0	0	1	1		1	1	1		3
2020-02-27 18:04:23	47	2	3	2	1	2	2	1	2	4	1	1	1	1	1	1	1	0	1	4	1	2	1	1	0	1	1	0	1	1	0	1	1	1	3	2	3
2020-02-27 18:06:05	42	2	3	1	1	1	2	1	1	5	1	1	1	1	1	0	1	1	2	2	1	2	1	0	0	2	1	0	1	1	0	1	1	1	2	2	3
2020-02-27 18:07:24	45	1	2	2	1	1	1	1	1	4	1	1	1	1	0	1	1	1	1	3	1	3	1	0	0	1	1	0	1	1	1		1	5	3	2	3
2020-02-27 18:07:28	32	2	3	1	1	1	1	1	1	4	1	1	0	0	0	0	1	2	2	2	0	3	0	0	0	1	1	0	1	2	1		1	3	2	5	3
2020-02-27 18:07:44	45	1	2	2	1	1	1	1	1	4	1	1	1	1	0	1	1	1	1	3	1	3	1	0	0	1	1	0	1	1	1		1	5	3	2	3
2020-02-27 18:09:03	33	1	3	2	1	1	1	1	1	2	2	0	0	0	0	0	1	0	3	4	1	3	0	0	0	2	1	0	1	1	0	1	1	2	2	5	2
2020-02-27 18:09:46	60	1	3	1	4	1	1	2	1	2	1	1	1	1	1	1	1	1	1	2	1	2	1	0	0	2	1	1	1	1	0	1	1	1	1		6
2020-02-27 18:15:17	60	1	3	1	3	1	2	2	1	2	1	1	1	1	1	1	1	1	1	2	1	2	1	0	0	1	1	0	1	1	0	1	1	1	1		8
2020-02-27 18:16:14	19	2	2	1	3	1	1	1	2	5	2	0	0	0	1	1	0	2	1	2	1	4	1	0	1	3	0	1	1	1	0	1	1	3	4	2	8
2020-02-27 18:19:52	75	2	3	2	2	1	1	1	1	2	1	1	0	1	0	1	1	1	1	1	1	3	1	1	0	3	1	1	1	1	1		1	1	3	2	4
2020-02-27 18:20:51	25	1	3	2	3	1	2	1	1	1	1	1	1	1	1	1	1	0	2	2	1	3	0	1	0	1	1	0	1	1	1		1	1	2	2	1
2020-02-27 18:21:11	70	1	1	1	4	1	2	2	1	1	1	1	0	1	0	1	0	1	1	2	1	3	1	0	1	4	1	0	1	1	1		1	4	2	5	5
2020-02-27 18:22:30	24	1	2	1	3	1	2	1	2	5	2	1	0	1	0	0	1	2	1	2	1	3	0	0	0	1	1	1	1	1	0	1	1	2	3	2	6
2020-02-27 18:24:22	42	1	3	1	1	1	1	2	1	3	1	1	1	1	1	1	1	2	1	1	1	3	1	0	0	2	1	0	1	1	1		1	1	3	2	2
2020-02-27 18:38:49	24	2	3	1	1	1	1	2	1	2	2	1	0	1	1	1	1	1	1	2	1	3	1	0	0	3	1	1	1	1	0	1	1	2	1		6
2020-02-27 18:39:02	42	1	3	1	1	2	1	3	1	1	1	1	1	1	1	1	1	2	1	4	1	3	0	0	0	4	1	0	1	1	1		0	4	1		1
2020-02-27 18:43:25	32	1	3	2	1	1	1	1	1	4	1	1	1	1	1	1	1	2	2	4	1	4	1	1	0	1	1	0	1	1	0	1	1	1	2	5	8
2020-02-27 18:44:53	58	2	1	1	2	1	1	1	1	1	1	1	1	1	1	1	1	1	1	4	1	2	1	0	0	2	1	1	1	1	0	1	1	1	2	5	5
2020-02-27 18:45:19	28	2	3	1	1	1	2	1	1	5	1	1	1	1	0	1	1	1	1	2	1	2	1	1	1	1	0	0	0	2	0	2	1	1	4	1	1
2020-02-27 18:46:16	47	2	3	2	1	2	1	1	2	5	1	1	1	1	1	1	1	1	2	4	1	3	1	1	1	2	0	0	1	1	0	1	0	2	2	2	5
2020-02-27 18:47:36	42	2	3	1	1	1	1	3	1	4	2	0	0	1	1	1	0	1	1	1	1	3	1	0	0	4	0	0	1	1	0	1	1	1	2	2	3
2020-02-27 18:47:49	23	1	3	1	1	1	1	1	2	2	2	1	1	1	1	1	1	1	1	2	1	1	0	1	0	2	1	0	1	1	1		1	1	3	2	7
2020-02-27 18:48:20	27	2	3	1	2	2	1	1	1	1	1	1	1	0	1	0	1	0	1	2	1	3	0	0	1	1	0	1	0	1	1		1	2	2	4	2
2020-02-27 18:48:36	70	2	1	1	2	2	2	4	2	2	1	1	0	1	0	1	1	2	1	2	0	4	0	0	0	2	1	0	1	1	0	1	1	4	3	2	2
2020-02-27 18:56:00	80	1	3	2	2	2	1	4	1	2	1	1	1	1	0	1	1	1	1	1	1	3	1	0	0	1	1	0	1	1	0	3	1	1	2	2	8
2020-02-27 18:56:28	54	2	3	1	2	1	2	1	1	5	1	1	1	1	1	1	1	2	1	4	0	4	0	1	0	1	1	0	1	1	1		1	1	2	2	2
2020-02-27 18:58:02	19	1	3	2	3	1	1	1	2	5	2	0	0	0	0	0	0	0	1	4	1	4	0	0	1	1	0	1	0	1	0	1	1	5	3	2	8
2020-02-27 18:59:53	54	2	1	1	2	2	2	1	1	5	1	1	0	1	0	0	1	1	1	2	0	3	1	1	0	1	1	0	1	1	1		1	3	3	2	2
2020-02-27 19:02:12	40	2	2	1	3	2	1	1	1	1	2	1	1	1	1	1	1	1	1	3	1	1	1	1	1	1	0	0	0	2	0	1	1	1	2	2	1
2020-02-27 19:03:01	21	2	3	2	3	1	1	2	1	2	1	1	0	1	0	1	1	1	1	1	1	4	1	0	0	1	1	0	1	1	0	1	1	2	3	2	2
2020-02-27 19:03:58	40	2	3	1	1	1	2	1	1	2	1	1	1	1	0	1	1	2	2	1	1	3	1	1	0	4	1	0	1	1	1		1	4	3	5	8
2020-02-27 19:04:17	38	2	3	1	1	1	2	3	1	5	1	1	0	1	1	1	1	1	1	4	1	3	1	0	0	3	0	1	1	1	0	1	1	3	4	6	4
2020-02-27 19:04:32	25	2	3	1	2	2	1	1	1	1	2	1	0	1	1	1	1	2	1	2	1	3	1	1	1	2	1	0	1	1	0	1	1	2	2	3	2
2020-02-27 19:05:31	20	2	2	1	2	1	2	1	2	5	2	1	1	1	1	1	1	1	1	2	1	4	1	1	1	1	0	0	0	1	0	1	1	3	4	1	2
2020-02-27 19:06:13	54	1	3	1	2	1	1	4	1	2	1	1	0	1	1	1	1	0	1	2	1	2	1	1	0	2	1	0	1	1	0	2	1	1	3	2	2
2020-02-27 19:06:15	60	1	3	1	4	1	1	2	1	4	1	1	1	1	0	1	1	1	1	4	1	3	0	0	1	2	0	1	1	2	1		1	4	3	5	5
2020-02-27 19:09:37	55	2	3	1	4	2	3	1	2	5	1	1	1	1	1	1	1	2	1	4	1	4	1	1	1	4	0	0	1	1	0	1	0	5	1		1
2020-02-27 19:13:12	22	1	2	1	3	1	1	1	1	4	2	1	0	0	1	1	0	2	1	2	1	4	1	0	1	1	1	1	1	1	0	1	1	1	1		5
2020-02-27 19:15:51	50	1	3	2	1	1	2	1	1	2	1	1	1	1	0	1	0	0	1	1	1	2	0	1	0	1	1	0	1	1	1		1	1	2	2	2
2020-02-27 19:17:12	43	1	3	2	1	1	2	1	1	1	1	1	1	1	0	1	1	0	1	2	1	2	0	0	0	2	1	0	1	1	1		1	4	2	2	1
2020-02-27 19:18:33	50	1	3	1	1	1	1	2	1	1	1	1	1	1	1	1	1	1	1	2	1	3	1	1	0	2	1	0	1	1	1		1	1	2	4	2
2020-02-27 19:24:15	33	1	3	1	1	2	1	4	1	2	1	0	0	0	0	0	0	0	1	2	0	3	0	0	1	4	1	1	0	2	0	1	1	5	3	2	5
2020-02-27 19:25:46	37	1	3	1	1	1	2	1	1	4	1	0	0	1	0	0	1	0	1	1	1	3	0	0	1	4	0	1	0	1	0	3	1	3	2	5	8
2020-02-27 19:26:30	70	2	1	2	2	1	2	3	1	2	1	1	0	1	0	1	1	2	1	1	0	2	1	0	0	2	1	0	1	1	0	1	1	4	3	2	2
2020-02-27 19:27:36	60	1	1	1	1	2	1	2	1	2	1	1	1	0	0	1	1	1	1	1	1	4	1	1	1	1	0	0	0	2	1		0	1	1		4
2020-02-27 19:27:47	33	2	3	1	2	1	1	3	1	5	1	1	1	1	1	0	0	1	2	2	1	3	1	1	0	1	1	0	1	2	0	1	1	2	1		1
2020-02-27 19:30:58	46	2	3	1	1	1	1	3	1	2	1	1	1	1	0	1	1	1	1	2	1	2	1	0	1	1	1	0	1	1	0	2	1	1	2	2	3
2020-02-27 19:31:55	13	2	2	1	3	2	1	1	1	4	1	0	0	1	1	0	1	2	1	2	1	3	1	0	0	3	1	0	1	1	0	1	1	3	2	3	4
2020-02-27 19:32:22	46	2	3	1	1	1	2	1	1	4	1	1	1	1	1	1	1	0	1	2	1	3	0	0	0	1	0	0	1	1	0	2	1	4	2	4	3
2020-02-27 19:34:42	24	2	3	1	1	2	2	1	2	1	1	1	1	1	1	1	1	2	3	4	0	2	0	0	0	1	1	0	1	1	1		1	1	2	2	5
2020-02-27 19:36:39	32	2	3	2	1	1	3	1	2	4	2	1	0	0	0	0	1	2	1	2	0	4	1	1	1	1	0	0	0	1	0	1	0	5	3	2	3
2020-02-27 19:46:02	21	1	3	1	3	1	1	2	1	2	2	1	0	1	1	1	1	1	1	4	1	3	1	0	0	2	1	0	1	1	1		1	1	2	5	3
2020-02-27 19:48:22	44	2	3	2	1	2	2	1	2	4	1	1	1	1	0	1	0	1	1	4	1	4	1	1	1	3	0	1	1	1	1		1	5	2	3	6
2020-02-27 19:52:48	27	1	2	2	2	1	1	2	1	1	2	0	0	1	0	1	0	2	1	2	1	4	0	0	0	1	0	1	1	1	0	1	1	3	4	5	4
2020-02-27 19:59:27	29	1	3	1	1	1	1	3	2	2	1	0	0	0	1	1	0	1	1	2	1	3	0	1	0	1	0	1	0	1	0	1	1	3	2	2	1
2020-02-27 20:04:31	49	2	3	1	2	1	2	1	1	5	1	1	0	1	0	1	0	0	1	4	1	3	1	0	0	3	1	0	1	1	1		1	1	4	2	7
2020-02-27 20:06:29	30	1	3	1	1	1	1	1	1	2	1	1	1	1	0	0	1	2	3	4	1	4	0	1	0	4	1	1	1	1	1		1	4	1		1
2020-02-27 20:13:57	70	2	3	1	1	2	1	2	1	5	1	1	1	1	0	1	1	1	1	4	0	1	0	0	0	1	1	0	1	1	1		1	1	2	1	1
2020-02-27 20:14:53	10	1	2	1	3	1	1	1	1	5	1	0	0	1	1	0	1	1	1	4	1	3	0	0	1	3	1	1	1	1	0	1	1	3	3	2	8
2020-02-27 20:16:31	38	2	3	1	1	1	2	2	2	2	1	1	1	1	0	1	0	1	3	4	1	2	1	0	1	1	1	0	1	1	0	1	1	1	3	2	2
2020-02-27 20:17:57	43	1	3	1	1	1	1	2	2	5	1	1	1	1	1	1	1	1	1	3	0	4	1	0	0	3	0	0	1	1	1		1	5	4	2	8
2020-02-27 20:23:01	32	1	3	2	1	1	1	1	2	5	1	1	0	0	0	0	1	1	1	4	1	2	0	1	1	3	1	1	1	1	0	2	0	1	3	2	6
2020-02-27 20:34:07	45	2	3	1	2	1	2	1	1	1	1	1	1	0	1	1	0	1	1	4	0	2	0	1	0	2	0	0	1	2	0	1	1	1	3	1	1
2020-02-27 20:54:38	70	1	3	1	4	1	2	3	2	4	1	1	0	1	0	1	1	2	1	4	1	4	0	0	0	4	0	1	0	1	0	1	1	4	2	3	4
2020-02-27 20:57:13	45	2	3	1	1	1	1	2	2	1	1	0	1	1	1	1	0	2	2	4	1	4	1	0	1	1	0	0	0	1	0	1	1	5	3	2	3
2020-02-27 21:03:04	45	1	3	1	1	1	2	1	2	5	1	1	1	1	0	1	1	2	1	4	0	4	0	1	1	1	0	1	1	1	1		1	1	4	2	2
2020-02-27 21:23:02	42	2	3	1	1	1	1	1	1	2	1	1	1	1	1	1	1	1	1	1	1	2	1	1	0	1	1	0	1	1	1		1	1	2	2	1
2020-02-27 21:26:16	52	1	3	1	1	1	2	2	1	1	1	0	0	1	0	1	0	2	2	2	1	3	1	0	0	1	0	0	0	1	0	1	1	5	2	3	8
2020-02-27 21:27:17	16	2	2	1	3	1	1	1	1	4	1	0	0	1	0	1	1	2	1	2	1	3	1	0	0	2	1	0	1	1	0	3	1	2	3	5	2
2020-02-27 21:30:00	33	1	3	2	1	1	1	2	1	4	1	0	0	1	0	0	0	1	1	1	1	3	0	0	0	3	0	1	1	1	0	1	1	3	2	2	5
2020-02-27 21:30:09	23	1	2	1	2	1	1	2	1	5	1	0	0	0	0	1	1	2	1	4	1	4	1	1	0	1	1	1	1	1	0	1	0	3	3	1	7
2020-02-27 21:30:17	23	1	2	1	2	1	1	2	1	5	1	0	0	0	0	1	1	2	1	4	1	4	1	1	0	1	1	1	1	1	0	1	0	3	3	1	7
2020-02-27 21:31:47	24	1	3	1	3	1	2	1	1	5	1	0	1	0	1	1	1	2	1	2	1	3	0	0	0	2	1	0	1	1	0	1	1	1	3	3	1
2020-02-27 21:35:47	23	2	2	1	2	1	1	1	1	2	1	0	0	1	1	1	0	1	1	4	1	4	1	0	0	3	1	1	1	1	0	1	1	2	1		8
2020-02-27 21:38:47	40	1	3	2	1	1	2	1	1	2	1	1	1	1	1	1	0	1	1	2	1	3	0	1	0	2	1	0	1	1	1		1	1	1		2
2020-02-27 21:40:02	24	2	3	1	2	1	1	3	1	1	1	1	1	1	1	1	1	1	3	2	1	2	1	1	1	2	0	0	1	1	0	1	1	1	4	3	1
2020-02-27 21:50:39	52	2	1	2	4	1	1	2	1	4	1	1	1	1	0	1	0	2	1	2	1	4	0	0	1	1	1	1	1	1	1		1	5	1		5
2020-02-27 21:53:05	50	2	2	1	2	1	2	2	1	3	1	1	0	1	1	1	1	1	1	2	1	3	1	0	0	1	1	0	1	1	0	1	1	1	2	2	4, 5
2020-02-27 21:54:53	22	1	3	1	3	1	1	3	1	5	1	0	0	1	1	0	0	1	1	4	1	3	1	0	1	2	0	1	1	1	0	3	1	4	2	2	2, 3, 4, 6, 8
2020-02-27 22:01:09	40	1	3	1	1	1	1	4	2	4	2	0	0	1	1	1	0	2	2	2	0	3	1	0	0	1	1	0	0	1	1		1	2	3	2, 5	3
2020-02-27 22:02:23	20	2	2	1	3	1	2	1	1	5	2	1	1	1	1	1	0	1	2	1	1	3	0	0	1	1	1	0	0	1	0	1	1	5	3	6	4
2020-02-27 22:12:47	27	2	3	1	2	1	1	2	2	5	2	0	0	1	0	1	0	2	1	3	1	4	0	0	1	2	1	1	0	1	0	1	1	5	4	1	2, 6
2020-02-27 22:18:31	40	1	3	1	1	1	1	1	1	5	1	1	0	1	0	1	1	1	1	4	1	4	0	0	0	1	1	0	0	1	0	1	1	4	3	3, 4	2, 5
2020-02-27 22:38:52	23	2	3	1	3	1	1	2	1	4	1	1	0	1	0	0	0	1	1	1	0	4	1	0	1	1	0	1	1	2	0	1	1	4	1		2, 6
2020-02-27 22:41:39	64	2	3	2	1	1	1	1	2	4	1	1	0	0	1	1	1	2	1	2	1	4	1	0	1	1	1	0	1	1	0	1	1	1	3	2	8
2020-02-27 22:51:56	19	1	2	2	3	2	2	1	2	1	1	1	0	1	0	1	1	2	1	2	1	3	0	0	0	1	1	0	1	1	0	1	0	5	1		6
2020-02-27 23:20:32	35	2	3	2	2	1	1	3	2	5	2	0	0	1	1	0	1	1	1	1	1	1	0	0	1	2	1	1	1	1	0	1	1	1	3	1, 2	1, 6, 7, 8
2020-02-27 23:22:10	53	1	3	1	4	1	2	1	1	2	1	1	1	1	1	1	1	1	1	2	1	3	1	1	1	2	1	0	1	1	1		1	4	2	1	3
2020-02-27 23:51:53	60	1	3	2	4	1	1	1	1	4	1	0	0	1	0	0	1	1	1	1	0	3	1	1	0	1	1	0	1	1	1		1	4	3	1, 2	5
2020-02-27 23:59:58	33	1	4	1	1	2	2	1	2	5	1	1	0	1	0	1	1	2	2	4	1	4	0	0	0	1	0	0	1	2	1		1	4	2	2, 3, 5	1, 2, 3, 4, 5
2020-02-28 00:31:47	14	1	2	1	3	1	1	1	1	4	1	1	0	0	1	1	0	1	1	1	1	3	1	0	1	3	1	0	1	1	0	1	1	3	1		4, 5, 8
2020-02-28 01:44:27	28	2	2	2	1	1	1	2	1	4	1	0	0	1	1	1	1	1	1	2	1	3	1	0	1	2	1	0	1	2	0	2	1	3	1		1, 6
2020-02-28 01:44:53	46	2	3	1	1	1	2	1	1	5	1	1	1	1	1	1	1	0	2	2	0	3	1	0	1	4	0	0	0	1	0	1	1	1	3	1	2
2020-02-28 01:52:10	23	2	3	1	2	2	2	2	1	2	1	1	1	1	1	0	0	2	2	3	1	4	0	0	1	4	1	0	0	2	1		1	5	2	2, 4	2, 5
2020-02-28 01:58:06	58	2	1	1	2	1	1	1	1	1	1	1	1	1	1	1	1	1	1	4	1	2	1	0	0	2	1	1	1	1	0	1	1	1	2	5	5
2020-02-28 02:09:09	24	1	2	2	2	1	2	1	1	3	1	1	1	1	1	0	1	1	1	2	1	2	1	1	1	2	1	0	1	1	0	2	1	3	3	2, 3	1, 6
2020-02-28 02:43:26	50	1	3	1	1	1	2	3	1	5	1	0	0	0	0	1	1	0	1	4	1	3	0	0	0	1	1	0	1	1	1		1	2	1		5
2020-02-28 02:47:32	42	2	3	1	1	2	3	3	1	2	1	1	0	1	1	1	0	0	1	4	1	3	0	0	0	1	1	0	1	2	0	2	1	1	3	3	2, 5
2020-02-28 02:49:21	49	2	3	1	1	1	1	1	1	5	1	1	1	1	0	1	1	2	1	1	1	4	0	0	1	1	1	1	0	2	0	2	1	4	3	3	3
2020-02-28 03:04:05	28	2	3	2	2	2	1	1	2	3	1	1	0	1	0	1	1	1	1	2	0	4	1	0	0	1	1	1	1	2	1		1	4	2	3	1, 6, 7, 8
2020-02-28 03:13:01	22	2	3	1	3	1	1	1	2	1	1	0	0	1	1	1	1	2	1	4	1	4	1	0	0	1	0	0	1	1	0	2	1	2	3	2, 5	2, 8
2020-02-28 03:24:17	11	1	2	1	3	1	1	1	1	5	1	1	0	1	1	1	0	2	1	1	1	3	1	0	0	2	0	0	1	1	0	3	1	3	2	2	4
2020-02-28 03:43:17	17	2	2	1	3	1	1	1	1	5	1	0	0	1	1	0	0	1	1	4	1	4	0	0	0	1	0	1	1	1	0	2	1	3	1		1, 4, 8
2020-02-28 04:48:18	20	2	3	1	3	1	3	1	2	4	1	1	1	1	0	1	0	2	1	2	1	1	1	1	1	1	1	0	1	1	1		1	4	2	5	8
2020-02-28 06:26:58	45	2	3	2	1	1	1	2	1	2	2	0	0	1	1	1	0	1	1	2	1	3	0	0	1	2	1	1	1	1	0	2	1	5	1		2
2020-02-28 06:57:26	54	1	3	1	4	1	1	3	1	5	1	0	0	1	0	0	0	0	1	2	1	2	0	0	0	1	0	0	1	2	1		1	1	3	3, 4	1, 6
2020-02-28 07:22:49	60	1	3	1	1	1	2	3	1	5	1	0	0	0	0	1	0	0	1	1	1	4	0	0	0	1	0	1	1	1	1		1	4	2	1	5
2020-02-28 07:23:42	60	1	4	1	1	1	1	4	1	2	1	1	0	1	0	0	0	2	1	1	1	2	1	0	0	2	1	1	1	1	0	3	1	3	2	2	2
2020-02-28 07:24:40	67	1	3	1	4	1	2	4	1	1	1	1	1	1	1	1	1	1	1	1	1	3	0	1	0	1	0	1	1	1	0	3	1	1	2	2	5
2020-02-28 07:29:38	60	1	4	1	1	1	1	4	1	2	1	1	0	1	0	0	0	2	1	1	1	2	1	0	0	1	1	1	1	1	0	3	1	3	2	2	2
2020-02-28 09:29:57	44	2	3	1	1	1	1	2	1	2	1	1	1	1	1	1	1	1	1	2	1	3	1	1	0	3	1	1	1	1	1		1	2	1		2
2020-02-28 09:36:21	17	2	2	1	3	1	1	1	1	4	2	1	0	1	1	1	1	1	1	1	1	3	1	0	0	3	0	1	1	1	0	1	1	3	2	2, 4	3, 4, 5, 8
2020-02-28 10:17:56	45	1	3	2	1	1	1	1	1	4	2	1	0	1	1	1	1	1	2	4	1	3	0	0	0	1	1	0	1	1	1		1	1	1		1
2020-02-28 11:10:33	30	2	3	1	1	1	2	1	2	4	2	0	1	1	0	1	0	1	3	3	1	1	0	1	0	1	0	0	0	1	0	2	0	1	4	1	1
2020-02-28 11:29:52	54	1	3	1	1	1	1	2	1	2	1	1	1	1	0	1	1	1	2	2	1	3	0	1	0	2	0	0	1	1	1		1	3	2	2, 5	8
2020-02-28 11:40:11	43	2	3	2	1	1	1	1	1	5	1	0	0	1	1	1	1	1	1	4	1	4	1	0	0	1	1	0	1	1	1		1	4	3	2, 4, 5	3, 4, 8
2020-02-28 11:42:38	55	1	3	1	1	1	2	3	1	5	2	1	0	1	1	1	1	1	1	3	1	3	0	0	0	2	1	0	1	1	0	1	1	1	2	3, 5	2, 3, 5
2020-02-28 11:59:00	49	2	3	1	1	1	2	2	2	4	2	1	0	1	1	1	1	2	1	4	1	3	1	0	0	3	0	1	1	1	0	1	1	5	2	2, 3	2, 5, 8
2020-02-28 12:00:32	40	2	3	1	1	1	1	1	1	1	1	1	1	1	0	1	1	2	1	2	1	3	1	0	0	4	1	0	1	1	0	1	1	1	2	2, 5	5
2020-02-28 12:17:31	19	1	2	1	3	1	1	1	2	2	2	0	0	1	1	1	0	1	1	4	1	3	1	1	0	3	1	0	0	1	0	1	1	3	2	2	5
2020-02-28 12:27:23	42	2	3	1	1	1	1	1	1	5	1	1	1	1	1	0	1	2	1	2	1	4	1	0	0	1	1	0	0	1	0	1	0	5	3	4	3
2020-02-28 13:21:59	21	1	3	1	3	1	1	1	2	5	1	0	0	1	0	0	0	0	1	2	1	3	1	1	1	1	1	0	0	1	0	3	1	1	4	1, 2, 3	1, 2, 3, 4, 5
2020-02-28 13:23:20	70	1	1	2	2	1	2	2	1	5	1	1	1	1	1	1	1	2	3	2	1	1	1	0	0	2	1	1	1	1	1		1	4	2	2	1, 5, 6
2020-02-28 13:38:33	42	2	3	1	1	1	1	3	1	5	2	1	0	1	1	1	1	1	1	2	1	3	1	0	1	2	1	1	1	1	0	2	1	1	2	1, 2	5, 6, 8
2020-02-28 14:15:24	19	2	2	2	3	1	2	1	1	2	2	1	0	1	1	1	1	1	1	4	1	3	1	0	0	2	1	0	1	1	0	3	1	5	2	2, 4	4, 6, 7
2020-02-28 14:51:25	22	1	2	1	1	1	1	3	1	2	1	0	0	1	0	0	1	2	1	4	0	3	0	0	0	1	1	1	1	2	1		1	5	2	5	2, 3, 5
2020-02-28 14:55:32	21	1	3	1	3	1	1	2	2	5	2	0	0	1	0	1	0	0	1	2	1	1	0	0	1	2	1	0	0	1	0	2	1	5	2	1, 2, 5	8
2020-02-28 15:24:19	15	1	2	2	3	1	1	1	2	5	1	1	0	1	0	0	0	2	1	4	1	4	1	1	1	3	1	0	1	2	1		1	3	4	1, 3, 5	1, 5, 6
2020-02-28 15:43:54	50	1	3	1	1	1	1	1	1	1	1	1	1	1	1	1	1	1	1	2	1	3	1	1	1	2	0	0	0	2	0	1	1	1	4	1	2
2020-02-28 16:13:43	66	1	2	2	3	2	2	1	1	2	1	1	0	0	1	1	1	0	2	1	1	3	0	0	1	2	0	1	0	2	1		1	1	3	3	1
2020-02-28 16:14:55	45	2	3	1	1	1	1	2	2	5	2	0	0	0	1	1	1	1	1	1	1	3	1	0	0	1	1	0	1	2	0	1	0	5	4	2	2
2020-02-28 16:31:14	35	1	3	1	3	1	2	1	2	2	1	1	1	1	1	0	1	2	1	1	1	3	0	0	1	2	0	0	1	1	0	2	1	4	3	2	2
2020-02-28 16:31:54	21	1	3	1	3	2	1	1	2	4	1	1	0	1	1	1	1	0	1	2	1	4	0	0	0	2	1	1	1	1	1		1	4	2	1	4
2020-02-28 16:33:50	27	1	3	1	2	1	2	1	2	2	1	1	0	1	0	0	0	1	1	1	1	3	0	0	1	2	0	0	1	1	1		1	1	2	2, 3	5
2020-02-28 17:08:30	40	1	3	1	1	1	2	1	2	2	1	1	1	1	1	1	1	1	1	2	1	3	1	0	1	1	0	0	1	1	0	2	1	1	1		3, 5
2020-02-28 17:26:54	28	1	3	1	1	2	1	1	2	5	1	1	0	1	0	1	1	1	2	1	1	3	1	1	0	3	1	1	1	1	1		1	3	3	1	1
2020-02-28 17:28:07	40	2	3	1	1	2	2	1	2	1	1	1	1	1	1	1	1	2	1	4	1	3	1	1	1	1	0	0	1	1	0	1	1	1	2	2	3
2020-02-28 17:32:43	26	1	3	1	1	1	1	1	2	1	1	1	1	1	1	1	1	1	1	1	0	2	1	1	1	3	0	0	0	1	0	1	1	2	2	2	1
2020-02-28 19:03:23	35	1	3	1	1	1	2	1	1	1	1	1	0	1	1	1	1	1	1	2	1	3	1	1	0	2	1	0	1	1	1		1	4	1		2
2020-02-28 19:18:38	61	2	1	1	2	1	2	3	1	2	1	1	1	1	1	1	1	0	1	1	1	3	1	0	0	1	1	0	1	1	0	2	1	1	3	3	4, 5, 6
2020-02-28 19:28:42	17	2	2	2	3	1	1	1	1	2	1	1	1	1	1	1	1	1	1	2	1	3	1	0	1	2	0	0	1	1	0	1	1	2	1		5
2020-02-28 19:49:29	44	2	3	1	4	1	1	1	1	2	1	0	0	1	1	0	0	2	1	4	1	3	1	0	0	2	1	1	0	1	0	1	1	1	2	2, 5	5
2020-02-28 21:10:47	29	1	3	2	1	2	1	1	2	4	1	1	1	1	1	1	0	1	1	1	1	3	1	1	1	1	1	0	0	1	1		1	1	3	2	1, 5, 6
2020-02-28 21:33:24	72	1	3	2	1	1	1	4	2	5	2	1	0	1	1	0	0	1	2	1	0	3	0	0	0	1	0	0	1	1	0	1	1	1	2	2	1
2020-02-28 21:33:49	25	1	3	1	1	1	2	1	1	2	1	1	1	1	1	1	0	0	1	1	1	3	1	0	1	2	0	0	1	2	0	1	1	3	4	2	1
2020-02-28 21:53:27	27	2	3	1	3	1	1	3	1	2	1	1	0	1	1	0	1	0	2	2	1	3	1	0	1	2	0	1	1	1	0	3	1	3	1		2
2020-02-29 00:42:55	50	2	1	1	2	1	2	3	2	1	1	1	0	1	0	1	0	1	1	2	1	3	1	0	1	3	1	0	1	1	0	1	1	4	3	2	8
2020-02-29 01:57:04	26	2	3	2	2	1	1	1	1	5	2	1	0	1	1	1	1	1	1	2	1	4	1	0	1	2	1	0	1	1	0	2	1	3	2	2	3
2020-02-29 02:58:25	30	1	3	2	1	2	2	4	1	5	1	0	0	1	0	0	0	1	1	2	1	3	1	0	0	1	1	0	0	2	0	1	1	4	1		1, 4, 5
2020-02-29 03:40:41	32	1	3	2	1	1	1	1	2	5	1	1	0	0	0	0	1	1	1	4	1	2	0	1	1	3	1	1	1	1	0	2	0	1	3	2	6
2020-02-29 07:01:12	52	1	3	2	4	1	2	2	2	4	1	0	0	1	1	1	1	1	1	1	1	1	1	0	0	1	1	1	1	2	1		1	5	3	2, 3, 4	1, 7
2020-02-29 12:40:36	25	1	3	1	1	1	2	1	1	2	2	0	0	1	1	1	0	1	1	1	1	1	0	0	1	2	1	0	1	1	0	2	1	5	2	2, 4	4, 5, 6
2020-02-29 13:13:27	70	1	3	1	1	1	2	2	2	4	1	1	1	1	1	1	0	1	3	2	1	1	1	0	0	2	0	0	1	2	0	2	1	1	2	2	2
2020-02-29 17:13:21	15	1	2	2	3	1	1	1	2	5	1	1	0	1	0	0	0	2	1	4	1	4	1	1	1	3	1	0	1	2	1		1	3	4	1, 3, 5	1, 5, 6
2020-02-29 20:02:22	33	1	3	1	1	1	2	1	2	2	2	1	1	1	1	1	1	0	2	1	0	3	1	1	1	2	1	0	1	2	0	2	1	3	4	1	1, 8
2020-02-29 21:56:52	37	1	3	2	1	1	2	2	1	5	1	0	0	1	0	0	1	2	3	2	1	4	0	0	0	4	0	1	1	1	1		0	5	2	2	5
2020-02-29 21:58:10	50	2	4	2	1	1	1	1	1	4	1	1	0	1	1	1	1	0	1	2	1	4	1	0	0	4	1	0	1	1	1		1	4	1		2, 5, 8
2020-03-01 06:07:58	38	2	3	1	1	1	1	3	1	1	1	0	0	1	0	1	0	1	1	4	1	3	1	0	1	1	0	0	0	1	0	2	1	5	2		3
2020-03-01 22:38:26	19	2	2	1	3	1	1	1	2	2	1	1	0	0	1	0	0	1	1	1	1	4	1	0	0	2	0	0	1	1	0	1	1	5	3	5	4, 8
2020-03-02 00:27:42	31	2	3	2	2	1	1	3	1	1	1	0	0	0	0	1	1	2	1	1	1	4	0	0	0	2	1	0	1	1	0	2	1	5	3	3	6
2020-03-02 07:11:55	27	1	4	1	1	1	1	3	2	5	2	0	0	1	1	1	0	2	1	4	0	4	0	0	1	3	1	1	1	1	0	1	1	5	2	1, 3	3, 8
2020-03-02 13:11:58	21	1	3	1	3	1	1	1	2	2	1	1	1	0	0	1	0	1	2	2	1	1	1	0	0	1	1	0	0	2	0	2	0	1	4	1	2
2020-03-03 16:35:37	10	2	2	1	3	1	1	1	1	2	1	1	0	0	0	0	0	1	1	4	1	3	1	0	1	3	1	0	1	1	0	2	1	3	2	2	5
2020-03-03 19:04:38	49	2	3	1	1	1	1	1	2	4	2	1	0	1	1	1	0	1	1	1	1	3	1	0	0	2	0	1	1	1	0	2	1	2	1		3, 4, 5, 6
2020-03-03 19:38:44	23	2	2	1	3	1	1	2	1	2	2	0	0	1	1	1	0	1	1	1	1	3	0	0	0	1	1	1	1	1	0	2	1	4	3	3	3, 5
2020-03-04 08:14:56	70	1	1	2	4	2	1	2	1	5	1	1	1	1	0	1	1	2	2	4	1	4	1	0	0	1	1	0	1	1	0	3	0	5	3	2	1
2020-03-04 20:51:20	47	2	3	2	1	2	1	1	2	5	1	1	1	1	1	1	1	1	2	4	1	3	1	1	1	2	0	0	1	1	0	1	0	2	2	2	5
2020-03-05 06:57:17	39	2	3	2	1	1	2	1	1	4	1	1	1	1	1	1	1	1	1	4	1	3	0	0	0	1	1	0	1	2	0	2	1	3	1	3	5
2020-03-06 01:27:08	32	2	4	2	1	1	1	4	1	4	2	0	0	1	1	1	0	1	1	4	1	2	0	1	0	2	1	0	0	1	0	3	1	5	2	2, 5	5
2020-03-06 11:07:24	17	2	2	1	3	2	1	2	1	2	2	1	0	1	1	1	1	1	1	4	1	3	0	0	0	2	1	1	1	2	1		1	1	2	2	1, 2, 5
							1- Type 1 DM	1- 1 to 10 years	1- Yes	1- Clinician / Physician	1- Refregirator	1- Yes	1- Yes	1- Yes	1- Yes	1- Yes	1- Yes	0- No	1- 0 to 15 minutes	1- Abdomen	1- Yes	1- 45 degree	1- Yes	1- Yes	1- Yes	1- < 5sec	1- No	1- No	1- No	1- One month	1- No	1- 1 to 2 times	1- Yes	1- 1 to 2 times a day	1- Never	1- Too busy	1- Preparing insulin pen and injection site
							2- Type 2 DM	2- 11 to 20 years	2- Not sure	2- Diabetes educator	2- Room temperature	0- No	0- No	0- No	0- No	0- No	0- No	1- Yes	2- 16 to 30 minutes	2- Thigh	0- No	2- 60 degree	0- No	0- No	0- No	2- 5 to 10 sec	0- Yes	0- Yes	0- Yes	2- Morethan one month	0- Yes	2- 2-5 times	0- No	2- 3 to 4 times a day	2- Rarely	2- Forgetfullness	2- Taking injection on time
							3- Gestational DM	3- 21 to 30 years		3- Pharmacist								2- Ihave no idea on priming	3- more than 30 minutes	3- Buttocks		3- 90 degree				3- > 10 sec						3- Morethan 5 times		3- Morethan 4 times a day	3- Sometimes	3- Skipped meal	3- Taking injection during busy hours
								4- 31 to 50 years		4- Nurse										4- Arm		Don’t know				4- I remove the needle immediately								4- several times a week	4- Always	4- Embarrased to inject in public	4- Pain associated with injection
										5- Not received any training																								5- I rarely or never check		5- Traveling or changing normal routine	5- Taking injection away from home, during vacation, or during business trip
																																				6- Others (Sugar level is mildly elevated, I don’t have the injection, I feel I don’t want insulin anymore)	6- Number of daily injections
																																					7- Regimen is too complicated
																																					8- Adjusting insulin dose
																																					9- Measuring blood glucose routinely
																																					10- Fear of weight gain
																																					11- Fear of low sugar
